# Supplementary material
Source: PubMed Central journal article supplement (PMC4707750)
Supplement: rspb20151991supp1.pdf [file rspb20151991supp1.pdf]

**Table S1.** Results of paired Wilcoxon signed-rank tests; performed using data collected for 45 sets of single-male and triple-male groups.

| <b>Variable and test statistics</b> |                              | <b><i>related pair vs. unrelated pair</i></b> |                 | <b><i>all related vs. males unrelated</i></b> |                 |             |
|-------------------------------------|------------------------------|-----------------------------------------------|-----------------|-----------------------------------------------|-----------------|-------------|
| <b>Behaviour</b>                    | Courtships (events/day)      | $V_{135} = 657$                               | $p = 0.117$     | $V_{135} = 564$                               | $p = 0.604$     |             |
|                                     | Fighting (events/day)        | NA                                            | NA              | $V_{135} = 448.5$                             | $p = 0.439$     |             |
|                                     | Copulations (lifetime)       | $V_{135} = 135$                               | $p = 0.665$     | $V_{135} = 134.5$                             | $p = 0.664$     |             |
| <b>Fitness</b>                      | Longevity (days)             | $V_{135} = 519.5$                             | $p = 0.578$     | $V_{135} = 410$                               | $p = 1.000$     |             |
|                                     | Reproductive lifespan (days) | $V_{135} = 429$                               | $p = 0.990$     | $V_{135} = 503$                               | $p = 0.721$     |             |
|                                     |                              | Lifetime (total)                              | $V_{135} = 496$ | $p = 0.814$                                   | $V_{135} = 527$ | $p = 0.713$ |
|                                     | Egg production               | Lifetime (egg/day)                            | $V_{135} = 408$ | $p = 0.221$                                   | $V_{135} = 534$ | $p = 0.653$ |
|                                     |                              | Short-term (total)                            | $V_{135} = 488$ | $p = 0.940$                                   | $V_{135} = 482$ | $p = 0.707$ |
