# Supplementary material
Source: PubMed Central journal article supplement (PMC4707750)

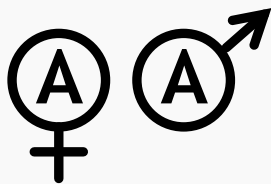

**Related pair**

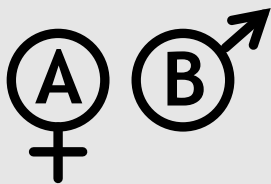

**Unrelated pair**

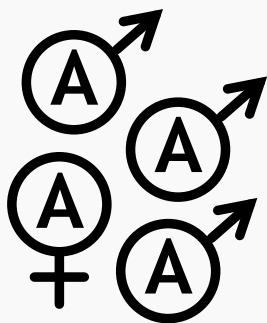

**All related**

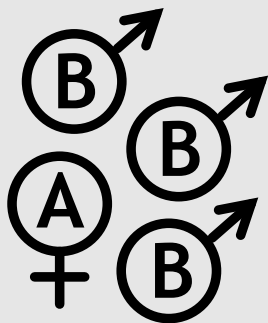

**Males related**

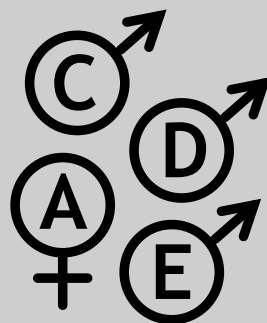

**All unrelated**

Supplement: rspb20151991supp2.pdf [file rspb20151991supp2.pdf]

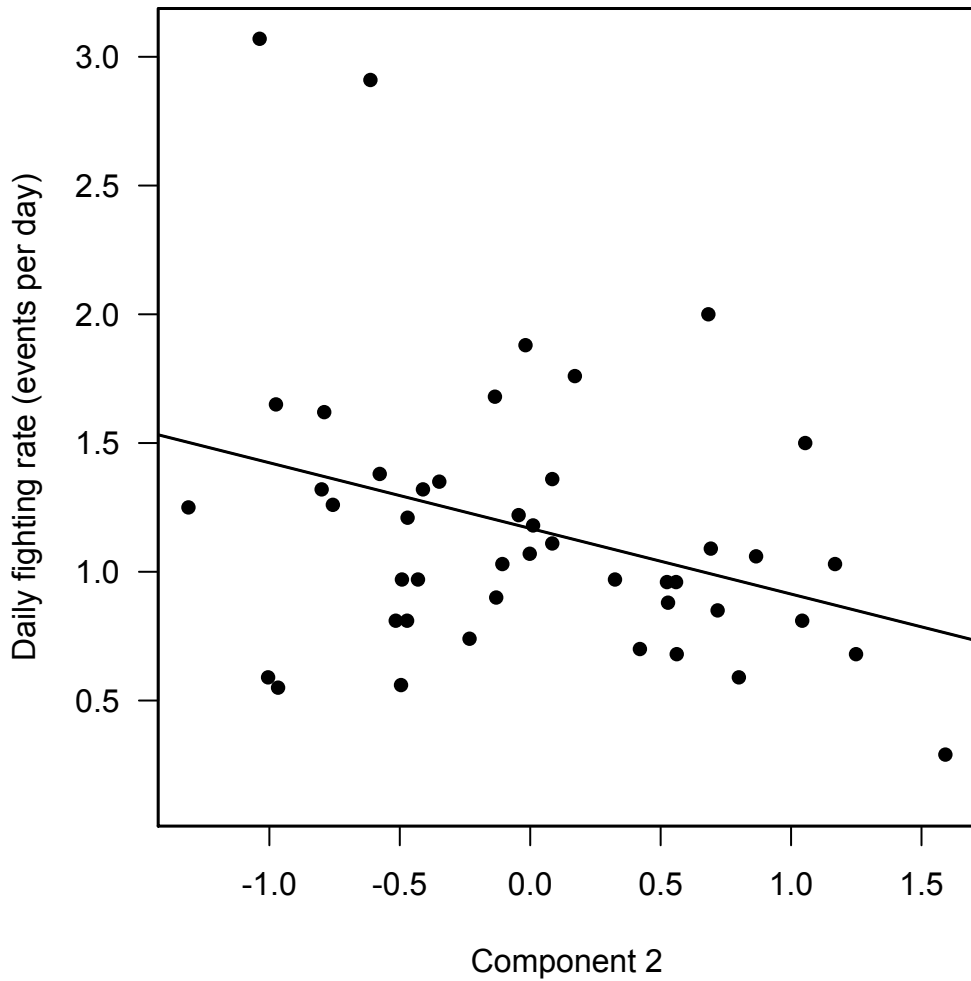

Supplement: rspb20151991supp3.pdf [file rspb20151991supp3.pdf]

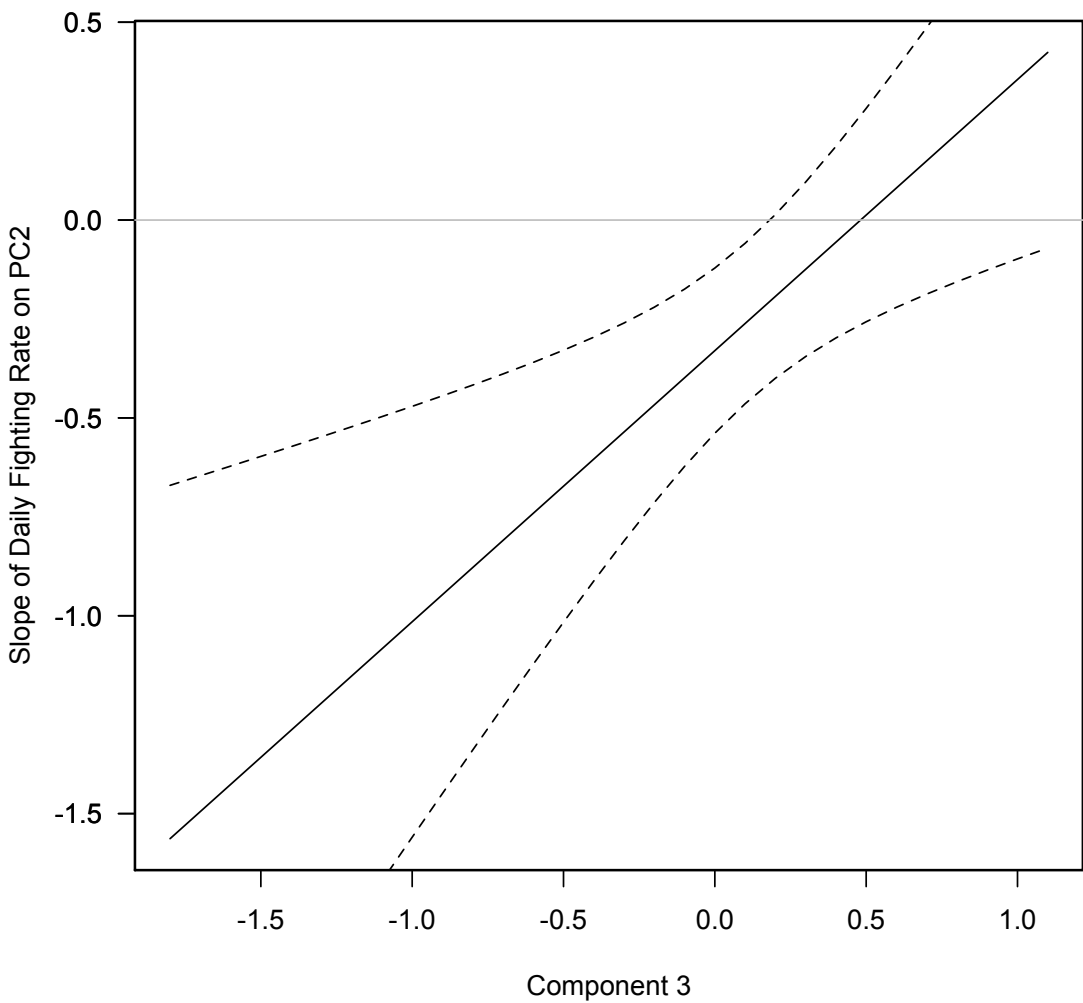

Supplement: rspb20151991supp4.pdf [file rspb20151991supp4.pdf]
